# Supplementary material for: Phosphorylation of the PA subunit of influenza polymerase at Y393 prevents binding of the 5′-termini of RNA and polymerase function
Source: PubMed Central journal article supplement (PMC10148841; doi:10.1038/s41598-023-34285-7), 2023-04-29
Supplement: 41598_2023_34285_MOESM4_ESM.pdf [file 41598_2023_34285_MOESM4_ESM.pdf]

IP: anti PA, WB anti-PA

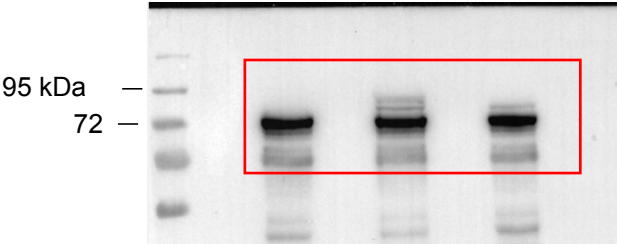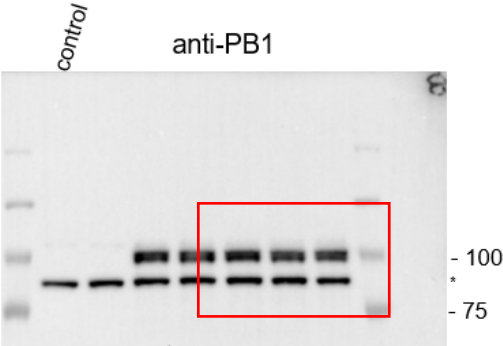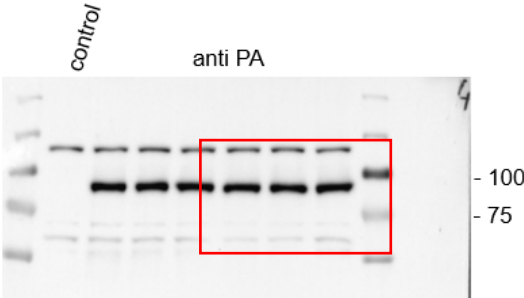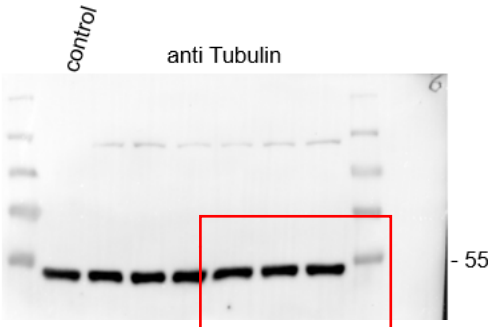

Fig. 2A

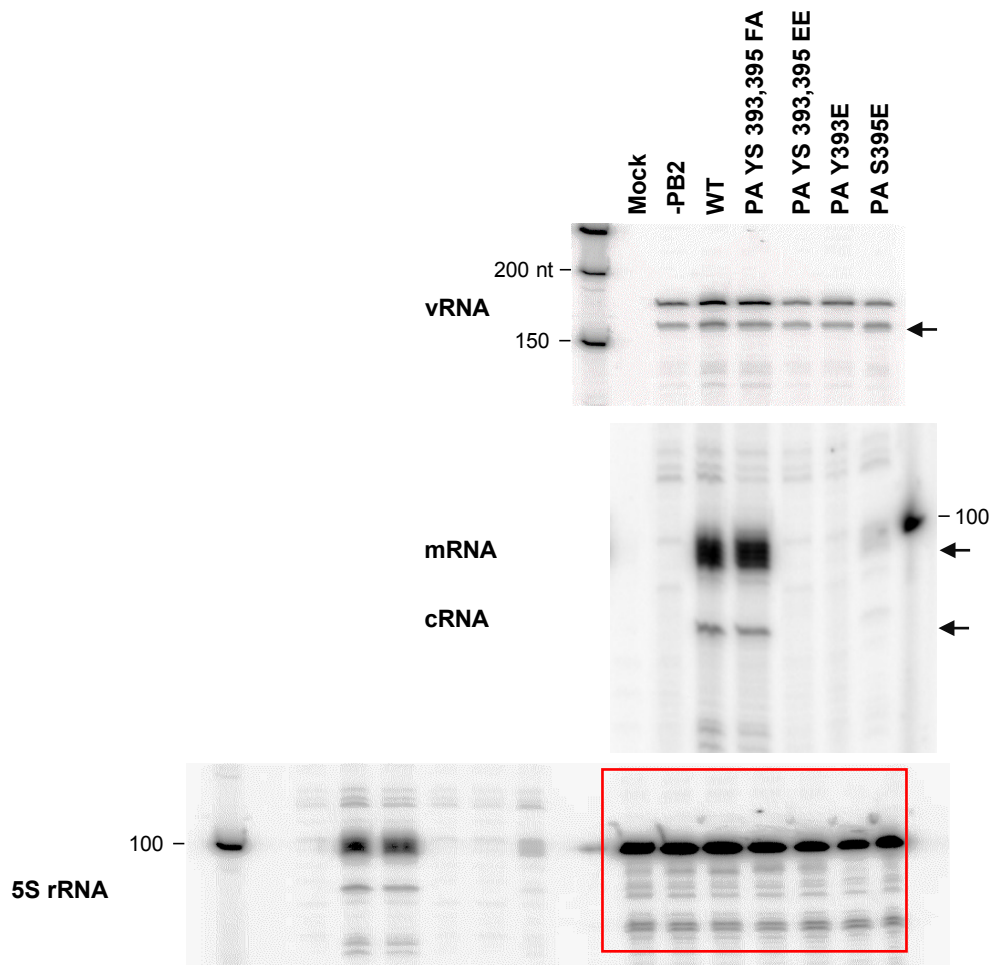

Fig. 3C

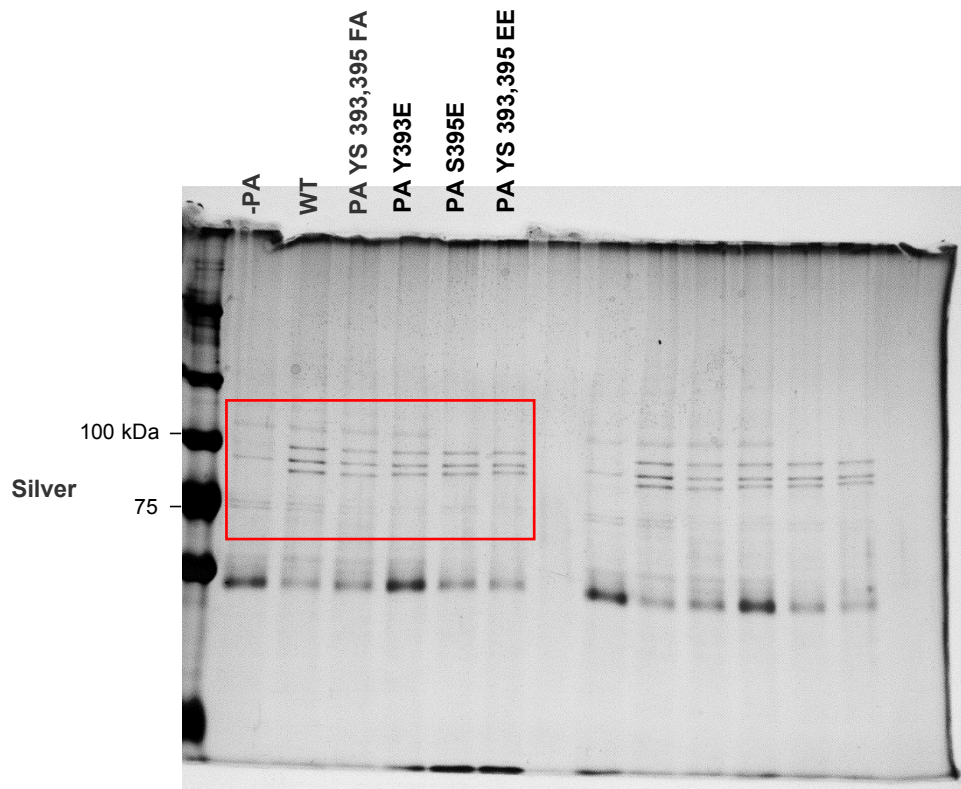

WB

anti-PB1

100

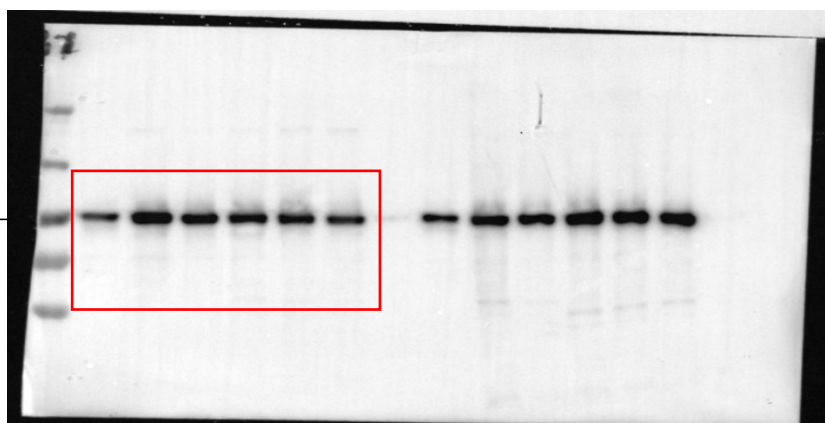

anti-PA

100 -  
75 -

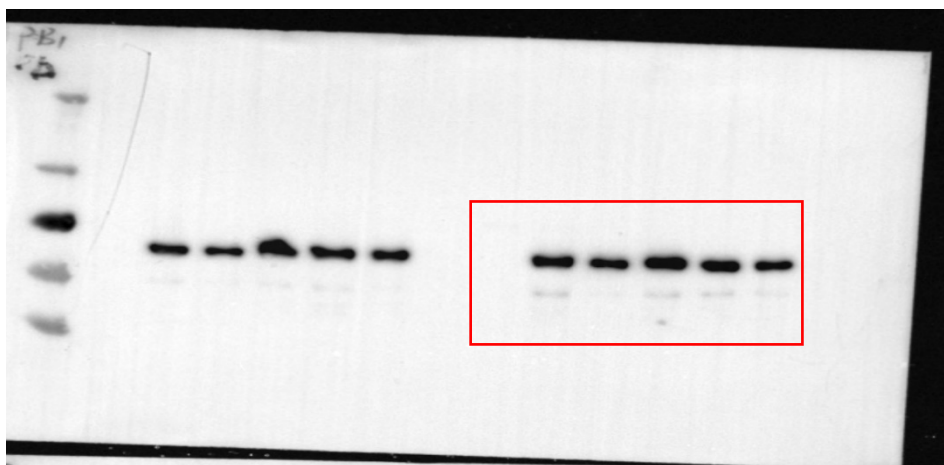

Fig. 4B

5' vRNA

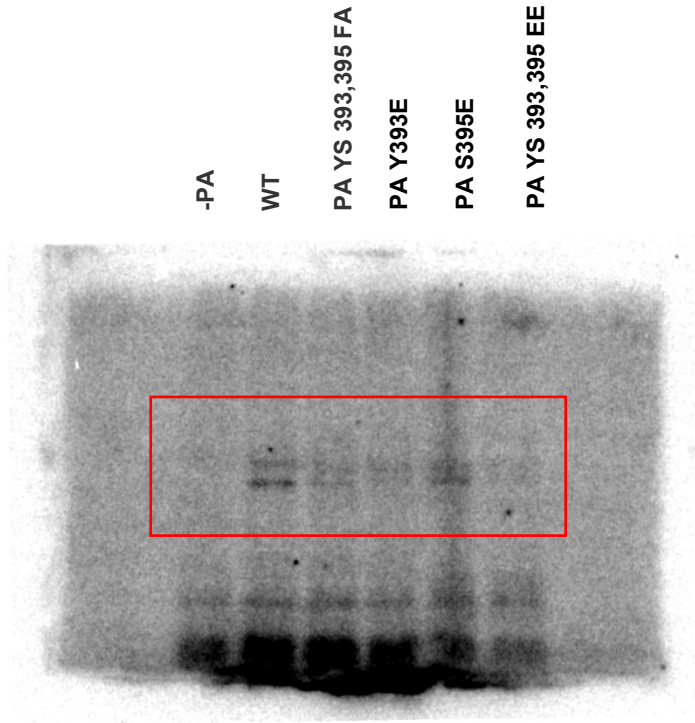

5' cRNA

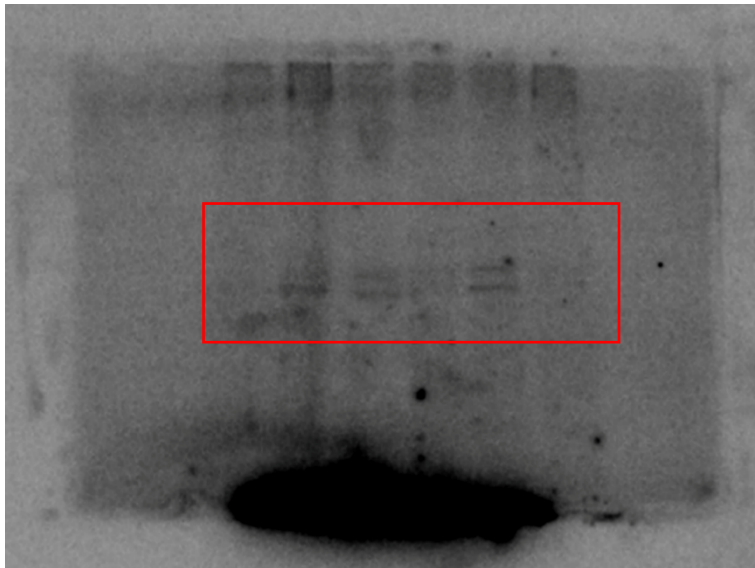

Fig. 4C

**A**

|                  | IP: anti-PA |   |   |   |   |   |
|------------------|-------------|---|---|---|---|---|
| PB2              | +           | + | + | + | + | + |
| PB1              | +           | + | + | + | + | + |
| PA WT            | +           | + |   |   |   |   |
| PA YS 393,395 FA |             |   | + |   |   |   |
| PA YS 393,395 EE |             |   |   | + |   |   |
| PA Y393E         |             |   |   |   | + |   |
| PA S395E         |             |   |   |   |   | + |

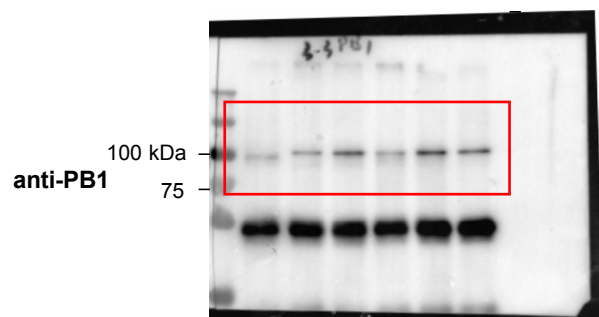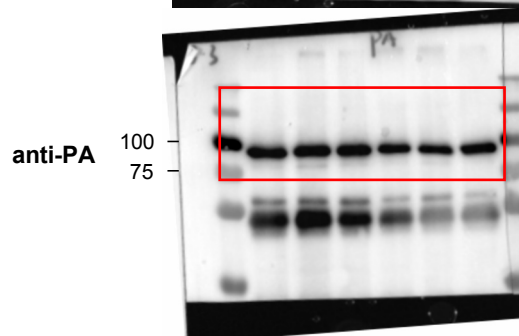Input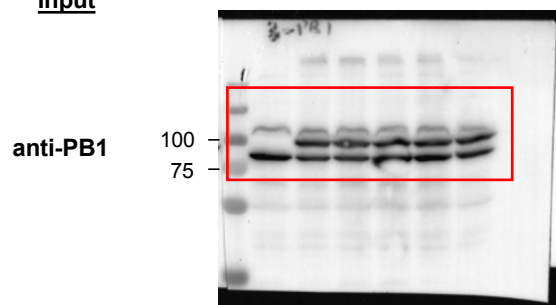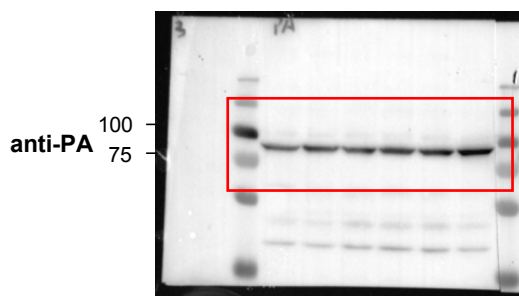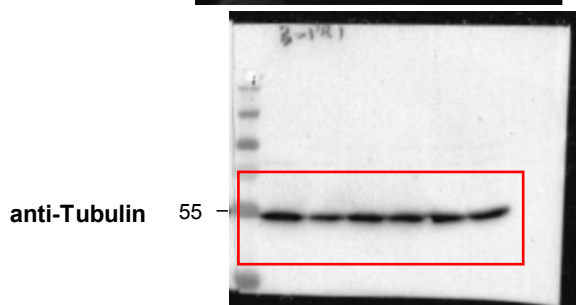**B**

|                  | IP: anti-PA |   |   |   |   |   |
|------------------|-------------|---|---|---|---|---|
| pHW72-Luci       | +           | + | + | + | + | + |
| PB2              | +           | + | + | + | + | + |
| PB1              |             | + | + | + | + | + |
| NP               | +           | + | + | + | + | + |
| PA WT            | +           | + |   |   |   |   |
| PA YS 393,395 FA |             |   | + |   |   |   |
| PA YS 393,395 EE |             |   |   | + |   |   |
| PA Y393E         |             |   |   |   | + |   |
| PA S395E         |             |   |   |   |   | + |

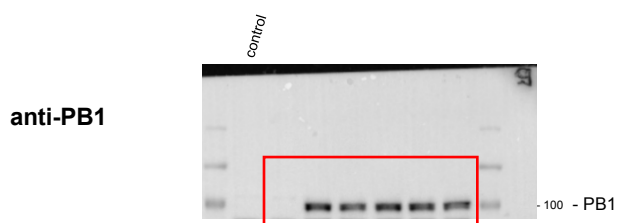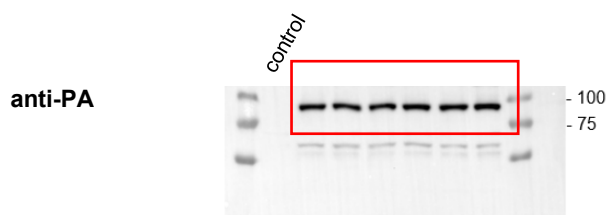Input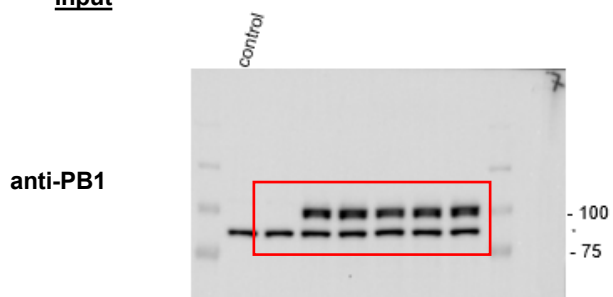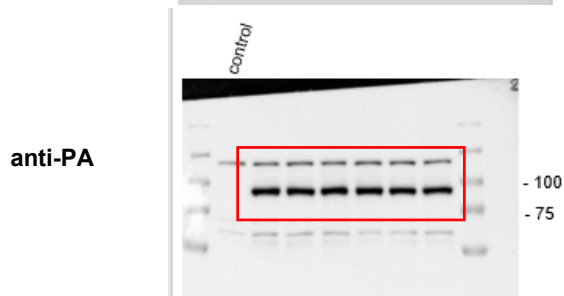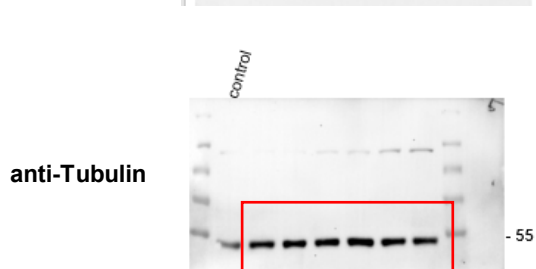

|                 |   |   |   |   |
|-----------------|---|---|---|---|
| PB2-TAP (SC35M) | + | + | + | + |
| PB1 (SC35M)     |   | + |   | + |
| PA (SC35M)      |   |   | + | + |
| PB2-TAP (WSN)   |   |   |   | + |
| PB1 (WSN)       |   |   |   | + |
| PA (WSN)        |   |   |   | + |

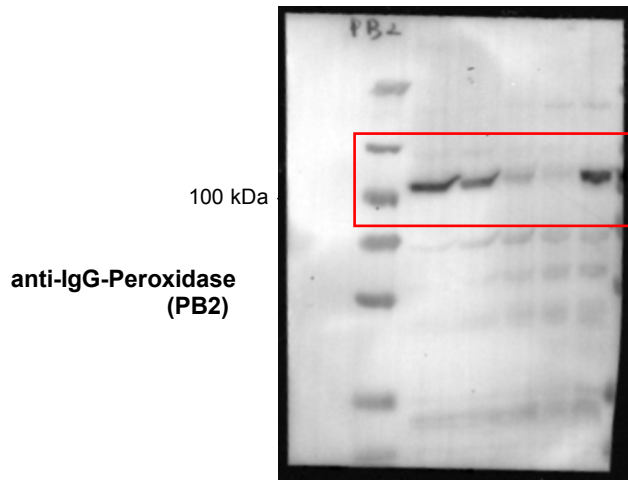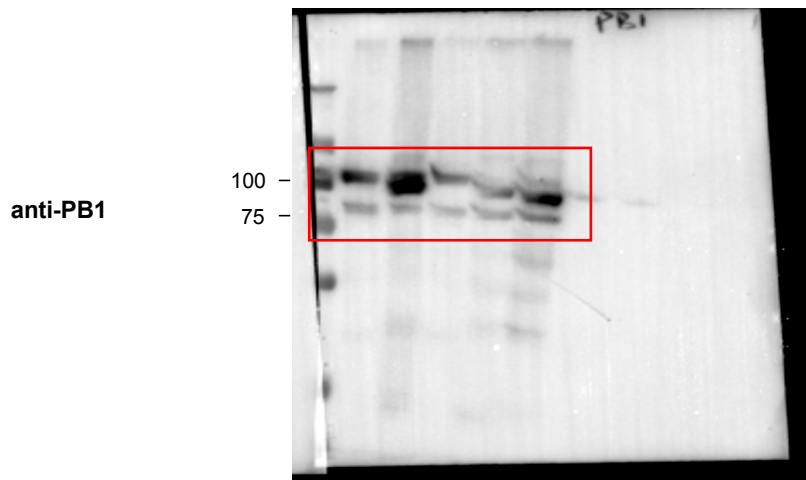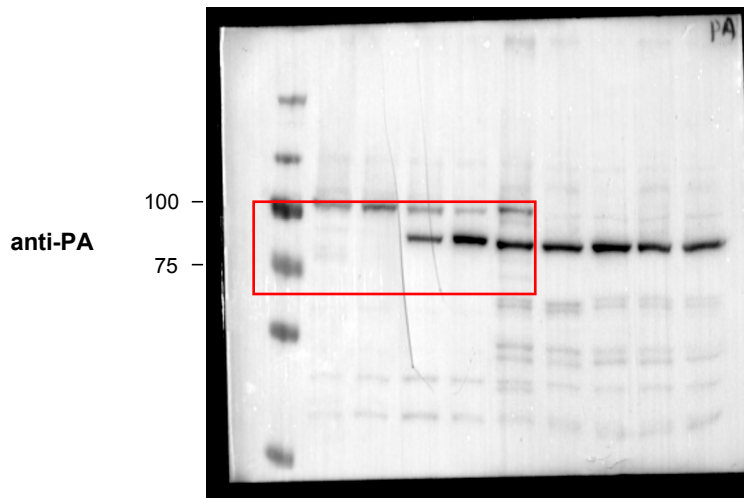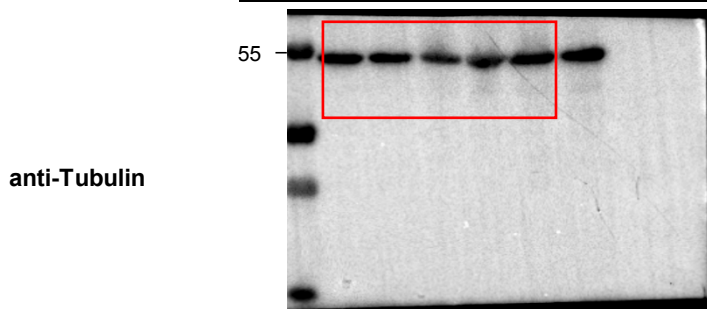

Fig. S4
